# Supplementary material for: Transcriptome and Gene Fusion Analysis of Synchronous Lesions Reveals lncMRPS31P5 as a Novel Transcript Involved in Colorectal Cancer
Source: MDPI journal article supplement (doi:10.3390/ijms21197120), 2020-09-27
Supplement: s1 [file s1]

| <i>Gene Symbol (NCBI gene database)</i> |                                        |                   |                     |                  |                              |
|-----------------------------------------|----------------------------------------|-------------------|---------------------|------------------|------------------------------|
| <b>colorectal cancer_ncbi</b>           | <b>colorectal cancer sporadic_ncbi</b> | <b>Lynch_ncbi</b> | <b>crc familial</b> | <b>poliposys</b> | <b>our data resequencing</b> |
| TGFB1                                   | BRCA2                                  | CYP17A1           | HPP1                | APC2             | CTNNA1                       |
| TP53                                    | IFNG                                   | RNASEL            | SCN1A               | TMEFF2           | NF1                          |
| CDH1                                    | MTOR                                   | MAX               | HNF4A               | AMER1            | RPS20                        |
| TNF                                     | JAK2                                   | KAT2A             | EGLN1               | APCDD1           | SDHA                         |
| SMAD7                                   | SERPINE1                               | PTPRG             | BMPR2               | REEP5            | SDHC                         |
| MYC                                     | PON1                                   | ANXA10            | DES                 | SPATA13          | SDHD                         |
| EGFR                                    | CCR5                                   | RINT1             | BDNF                | REEP6            |                              |
| VEGFA                                   | F5                                     | LRRFIP2           | TNFRSF11B           | APCDD1L          |                              |
| CDKN1A                                  | septin 9                               |                   | RAB27A              | HLA-DRB1         |                              |
| MTHFR                                   |                                        |                   | DACH1               | CFTR             |                              |
| IL6                                     |                                        |                   | TCF12               | HLA-B            |                              |
| APOE                                    |                                        |                   | CYP2C19             | HLA-A            |                              |
| ERBB2                                   |                                        |                   | TP63                | HLA-DQB1         |                              |
| HIF1A                                   |                                        |                   | CRYAB               | ADRB2            |                              |
| NFKB1                                   |                                        |                   | HMGA2               | HLA-C            |                              |
| ADIPOQ                                  |                                        |                   | PLA2G2A             | IL1A             |                              |
| ABCB1                                   |                                        |                   | ID2                 | HLA-DQA1         |                              |
| MMP9                                    |                                        |                   | SORT1               | IL33             |                              |
| PTGS2                                   |                                        |                   | PROX1               | PTX3             |                              |
| IL10                                    |                                        |                   | CARD8               | MUC5AC           |                              |
| CRP                                     |                                        |                   | AKAP9               | TSLP             |                              |
| CDKN2A                                  |                                        |                   | APBA1               | AXIN1            |                              |
| AKT1                                    |                                        |                   |                     | MMP8             |                              |
| COLCA1                                  |                                        |                   |                     | BTRC             |                              |
| ESR1                                    |                                        |                   |                     | CCL11            |                              |
| VDR                                     |                                        |                   |                     | PDE4D            |                              |

|        |  |  |  |         |  |
|--------|--|--|--|---------|--|
| BRAF   |  |  |  | HLA-DRA |  |
| PPARG  |  |  |  | MUC5B   |  |
| KRAS   |  |  |  | CCR3    |  |
| TLR4   |  |  |  | CSNK2A2 |  |
| CXCL8  |  |  |  | TNFSF4  |  |
| STAT3  |  |  |  | IL9     |  |
| PTEN   |  |  |  | COL11A1 |  |
| CTNNB1 |  |  |  | FH      |  |
| DCC    |  |  |  | CCR1    |  |
| TCF7L2 |  |  |  | IGHE    |  |
| NOS3   |  |  |  | SCRIB   |  |
| IL1B   |  |  |  | DNAJA3  |  |
| GSTM1  |  |  |  | CCL24   |  |
| IGF1   |  |  |  | MT-CO2  |  |
| APP    |  |  |  | DLG3    |  |
| BCL2   |  |  |  | MAPRE2  |  |
| BRCA1  |  |  |  | SCGB3A1 |  |
| CXCR4  |  |  |  | USP15   |  |
| GATA3  |  |  |  | IFRD1   |  |
| MDM2   |  |  |  | MAPRE3  |  |
| COLCA2 |  |  |  | DOCK4   |  |
| MMP2   |  |  |  | MIR663A |  |
| SLC6A4 |  |  |  | DCBLD2  |  |
| GSTT1  |  |  |  | PSG9    |  |
| MAPK1  |  |  |  | FOCAD   |  |
| CCND1  |  |  |  | SAPCD1  |  |
| AR     |  |  |  | SCGB1C1 |  |
| BIRC5  |  |  |  |         |  |
| GSTP1  |  |  |  |         |  |

|        |  |  |  |  |  |
|--------|--|--|--|--|--|
| TGFBR2 |  |  |  |  |  |
| COMT   |  |  |  |  |  |
| TERT   |  |  |  |  |  |
| LEP    |  |  |  |  |  |
| XRCC1  |  |  |  |  |  |
| CCL2   |  |  |  |  |  |
| HFE    |  |  |  |  |  |
| SOD1   |  |  |  |  |  |
| CTLA4  |  |  |  |  |  |
| FAS    |  |  |  |  |  |
| TLR2   |  |  |  |  |  |
| ATM    |  |  |  |  |  |
| KIT    |  |  |  |  |  |
| CXCL12 |  |  |  |  |  |
| ICAM1  |  |  |  |  |  |
| CD44   |  |  |  |  |  |
| ESR2   |  |  |  |  |  |
| PIK3CA |  |  |  |  |  |
| IL17A  |  |  |  |  |  |
| HMOX1  |  |  |  |  |  |
| AGT    |  |  |  |  |  |
| MAPK14 |  |  |  |  |  |
| IL18   |  |  |  |  |  |
| SPP1   |  |  |  |  |  |
| RB1    |  |  |  |  |  |
| RELA   |  |  |  |  |  |
| NOTCH1 |  |  |  |  |  |
| IL4    |  |  |  |  |  |
| MET    |  |  |  |  |  |

|        |  |  |  |  |  |
|--------|--|--|--|--|--|
| VWF    |  |  |  |  |  |
| NOD2   |  |  |  |  |  |
| ITGB3  |  |  |  |  |  |
| GJB2   |  |  |  |  |  |
| SRC    |  |  |  |  |  |
| FOXP3  |  |  |  |  |  |
| HLA-G  |  |  |  |  |  |
| RET    |  |  |  |  |  |
| CASP3  |  |  |  |  |  |
| PRNP   |  |  |  |  |  |
| CYP1A1 |  |  |  |  |  |
| MLH1   |  |  |  |  |  |
| SOD2   |  |  |  |  |  |
| ITGB1  |  |  |  |  |  |
| INS    |  |  |  |  |  |
| GSK3B  |  |  |  |  |  |
| CYP2C9 |  |  |  |  |  |
| NFE2L2 |  |  |  |  |  |
| IGF1R  |  |  |  |  |  |
| MAPK3  |  |  |  |  |  |
| SIRT1  |  |  |  |  |  |
| EDN1   |  |  |  |  |  |
| IL1RN  |  |  |  |  |  |
| AGER   |  |  |  |  |  |
| CDKN1B |  |  |  |  |  |
| AGTR1  |  |  |  |  |  |
| HMGB1  |  |  |  |  |  |
| BAX    |  |  |  |  |  |
| CAV1   |  |  |  |  |  |

|         |  |  |  |  |  |
|---------|--|--|--|--|--|
| JUN     |  |  |  |  |  |
| APC     |  |  |  |  |  |
| MMP1    |  |  |  |  |  |
| TNFSF10 |  |  |  |  |  |
| SP1     |  |  |  |  |  |
| PARP1   |  |  |  |  |  |
| RAC1    |  |  |  |  |  |
| MUC1    |  |  |  |  |  |
| MIR21   |  |  |  |  |  |
| ABCG2   |  |  |  |  |  |
| NOS2    |  |  |  |  |  |
| HGF     |  |  |  |  |  |
| KDR     |  |  |  |  |  |
| CD14    |  |  |  |  |  |
| ERCC2   |  |  |  |  |  |
| EP300   |  |  |  |  |  |
| UGT1A1  |  |  |  |  |  |
| PARK2   |  |  |  |  |  |
| FTO     |  |  |  |  |  |
| MGMT    |  |  |  |  |  |
| RHOA    |  |  |  |  |  |
| PTK2    |  |  |  |  |  |
| VHL     |  |  |  |  |  |
| PGR     |  |  |  |  |  |
| MAPK8   |  |  |  |  |  |
| HRAS    |  |  |  |  |  |
| NAT2    |  |  |  |  |  |
| MSH2    |  |  |  |  |  |
| FGF2    |  |  |  |  |  |

|          |  |  |  |  |  |
|----------|--|--|--|--|--|
| MIF      |  |  |  |  |  |
| HSP90AA1 |  |  |  |  |  |
| EZH2     |  |  |  |  |  |
| CASP8    |  |  |  |  |  |
| F3       |  |  |  |  |  |
| NPM1     |  |  |  |  |  |
| LCN2     |  |  |  |  |  |
| STAT1    |  |  |  |  |  |
| IGFBP3   |  |  |  |  |  |
| MPO      |  |  |  |  |  |
| EGF      |  |  |  |  |  |
| LGALS3   |  |  |  |  |  |
| PTPN11   |  |  |  |  |  |
| FN1      |  |  |  |  |  |
| CCL5     |  |  |  |  |  |
| MKI67    |  |  |  |  |  |
| MMP3     |  |  |  |  |  |
| ERCC1    |  |  |  |  |  |
| HDAC1    |  |  |  |  |  |
| ALB      |  |  |  |  |  |
| CYP2E1   |  |  |  |  |  |
| FASLG    |  |  |  |  |  |
| INSR     |  |  |  |  |  |
| CYP3A5   |  |  |  |  |  |
| TP73     |  |  |  |  |  |
| OGG1     |  |  |  |  |  |
| IGF2     |  |  |  |  |  |
| LEPR     |  |  |  |  |  |
| FLT1     |  |  |  |  |  |

|          |  |  |  |  |  |
|----------|--|--|--|--|--|
| E2F1     |  |  |  |  |  |
| IDH1     |  |  |  |  |  |
| ALK      |  |  |  |  |  |
| FGFR2    |  |  |  |  |  |
| TNFRSF1A |  |  |  |  |  |
| BCL2L1   |  |  |  |  |  |
| ALDH2    |  |  |  |  |  |
| AURKA    |  |  |  |  |  |
| RETN     |  |  |  |  |  |
| CHEK2    |  |  |  |  |  |
| SMAD4    |  |  |  |  |  |
| TYMS     |  |  |  |  |  |
| GJA1     |  |  |  |  |  |
| APEX1    |  |  |  |  |  |
| CDK1     |  |  |  |  |  |
| BMP2     |  |  |  |  |  |
| FGFR3    |  |  |  |  |  |
| CD40     |  |  |  |  |  |
| PRKCD    |  |  |  |  |  |
| GNAS     |  |  |  |  |  |
| TIMP1    |  |  |  |  |  |
| SLC2A1   |  |  |  |  |  |
| PLAUR    |  |  |  |  |  |
| PLK1     |  |  |  |  |  |
| CTGF     |  |  |  |  |  |
| C3       |  |  |  |  |  |
| IL13     |  |  |  |  |  |
| CSNK2A1  |  |  |  |  |  |
| PLAU     |  |  |  |  |  |

|          |  |  |  |  |  |
|----------|--|--|--|--|--|
| TLR3     |  |  |  |  |  |
| GRB2     |  |  |  |  |  |
| RAD51    |  |  |  |  |  |
| MICA     |  |  |  |  |  |
| PPARGC1A |  |  |  |  |  |
| MCL1     |  |  |  |  |  |
| PDCD1    |  |  |  |  |  |
| CYP1B1   |  |  |  |  |  |
| CXCL10   |  |  |  |  |  |
| PROM1    |  |  |  |  |  |
| BSG      |  |  |  |  |  |
| CASR     |  |  |  |  |  |
| NQO1     |  |  |  |  |  |
| POU5F1   |  |  |  |  |  |
| HSPA5    |  |  |  |  |  |
| F7       |  |  |  |  |  |
| PCNA     |  |  |  |  |  |
| CNR1     |  |  |  |  |  |
| NAMPT    |  |  |  |  |  |
| APOBEC3G |  |  |  |  |  |
| CD274    |  |  |  |  |  |
| SMAD3    |  |  |  |  |  |
| CLU      |  |  |  |  |  |
| GH1      |  |  |  |  |  |
| FGF23    |  |  |  |  |  |
| CBL      |  |  |  |  |  |
| CREB1    |  |  |  |  |  |
| MMP14    |  |  |  |  |  |
| IL2RA    |  |  |  |  |  |



|         |  |  |  |  |  |
|---------|--|--|--|--|--|
| DPP4    |  |  |  |  |  |
| PIK3R1  |  |  |  |  |  |
| IRS1    |  |  |  |  |  |
| FGFR1   |  |  |  |  |  |
| HSPB1   |  |  |  |  |  |
| RASSF1  |  |  |  |  |  |
| MIR146A |  |  |  |  |  |
| THBS1   |  |  |  |  |  |
| AHR     |  |  |  |  |  |
| HSPA4   |  |  |  |  |  |
| IL12B   |  |  |  |  |  |
| PML     |  |  |  |  |  |
| VCAM1   |  |  |  |  |  |
| XIAP    |  |  |  |  |  |
| FCGR2A  |  |  |  |  |  |
| ITGAV   |  |  |  |  |  |
| SHH     |  |  |  |  |  |
| CALCA   |  |  |  |  |  |
| SYK     |  |  |  |  |  |
| NFKBIA  |  |  |  |  |  |
| DNMT1   |  |  |  |  |  |
| HAMP    |  |  |  |  |  |
| EPO     |  |  |  |  |  |
| CDC42   |  |  |  |  |  |
| ITGB2   |  |  |  |  |  |
| CYP1A2  |  |  |  |  |  |
| ENG     |  |  |  |  |  |
| TWIST1  |  |  |  |  |  |
| NLRP3   |  |  |  |  |  |

|          |  |  |  |  |  |
|----------|--|--|--|--|--|
| TGM2     |  |  |  |  |  |
| HNF1A    |  |  |  |  |  |
| B2M      |  |  |  |  |  |
| EZR      |  |  |  |  |  |
| TNFRSF1B |  |  |  |  |  |
| PDGFRA   |  |  |  |  |  |
| BMI1     |  |  |  |  |  |
| S100B    |  |  |  |  |  |
| ADM      |  |  |  |  |  |
| FOXO3    |  |  |  |  |  |
| SELE     |  |  |  |  |  |
| SOX2     |  |  |  |  |  |
| CD209    |  |  |  |  |  |
| XRCC3    |  |  |  |  |  |
| IDO1     |  |  |  |  |  |
| IL15     |  |  |  |  |  |
| HP       |  |  |  |  |  |
| PRKDC    |  |  |  |  |  |
| VIM      |  |  |  |  |  |
| FOXO1    |  |  |  |  |  |
| MMP7     |  |  |  |  |  |
| VEGFC    |  |  |  |  |  |
| TOP2A    |  |  |  |  |  |
| ATP7B    |  |  |  |  |  |
| EGR1     |  |  |  |  |  |
| LGALS1   |  |  |  |  |  |
| MIR155   |  |  |  |  |  |
| FHIT     |  |  |  |  |  |
| CHI3L1   |  |  |  |  |  |

|        |  |  |  |  |  |
|--------|--|--|--|--|--|
| NBN    |  |  |  |  |  |
| STK11  |  |  |  |  |  |
| ANGPT2 |  |  |  |  |  |
| TGFBR1 |  |  |  |  |  |
| HPSE   |  |  |  |  |  |
| FCGR3A |  |  |  |  |  |
| F2R    |  |  |  |  |  |
| PDGFRB |  |  |  |  |  |
| BCL2L1 |  |  |  |  |  |
| CHEK1  |  |  |  |  |  |
| SOCS3  |  |  |  |  |  |
| NOTCH3 |  |  |  |  |  |
| DKK1   |  |  |  |  |  |
| DICER1 |  |  |  |  |  |
| SHC1   |  |  |  |  |  |
| LRP1   |  |  |  |  |  |
| YAP1   |  |  |  |  |  |
| BMP4   |  |  |  |  |  |
| BECN1  |  |  |  |  |  |
| NRAS   |  |  |  |  |  |
| IL4R   |  |  |  |  |  |
| CEBPB  |  |  |  |  |  |
| EPAS1  |  |  |  |  |  |
| ABCC1  |  |  |  |  |  |
| ERBB3  |  |  |  |  |  |
| LTF    |  |  |  |  |  |
| CBS    |  |  |  |  |  |
| F2RL1  |  |  |  |  |  |
| PIK3CG |  |  |  |  |  |

|        |  |  |  |  |  |
|--------|--|--|--|--|--|
| IFNB1  |  |  |  |  |  |
| CD34   |  |  |  |  |  |
| ITGA2  |  |  |  |  |  |
| PAK1   |  |  |  |  |  |
| FOXM1  |  |  |  |  |  |
| HSPD1  |  |  |  |  |  |
| RUNX3  |  |  |  |  |  |
| MIR34A |  |  |  |  |  |
| CAT    |  |  |  |  |  |
| POLG   |  |  |  |  |  |
| MME    |  |  |  |  |  |
| TIMP2  |  |  |  |  |  |
| SMAD2  |  |  |  |  |  |
| HDAC2  |  |  |  |  |  |
| PAX6   |  |  |  |  |  |
| ADAM17 |  |  |  |  |  |
| PTH    |  |  |  |  |  |
| ADH1B  |  |  |  |  |  |
| EPHX1  |  |  |  |  |  |
| SNAI1  |  |  |  |  |  |
| XPC    |  |  |  |  |  |
| SDC1   |  |  |  |  |  |
| CYP2A6 |  |  |  |  |  |
| IKBKB  |  |  |  |  |  |
| SPARC  |  |  |  |  |  |
| KLRK1  |  |  |  |  |  |
| SKP2   |  |  |  |  |  |
| S100A9 |  |  |  |  |  |
| IL23R  |  |  |  |  |  |

|          |  |  |  |  |  |
|----------|--|--|--|--|--|
| FOS      |  |  |  |  |  |
| PRKCB    |  |  |  |  |  |
| MYD88    |  |  |  |  |  |
| FUS      |  |  |  |  |  |
| STIM1    |  |  |  |  |  |
| SERPINF1 |  |  |  |  |  |
| CFLAR    |  |  |  |  |  |
| FLNA     |  |  |  |  |  |
| TXN      |  |  |  |  |  |
| GDF15    |  |  |  |  |  |
| SHBG     |  |  |  |  |  |
| CD28     |  |  |  |  |  |
| CDX2     |  |  |  |  |  |
| MTR      |  |  |  |  |  |
| NME1     |  |  |  |  |  |
| AHSG     |  |  |  |  |  |
| SMARCB1  |  |  |  |  |  |
| SLCO1B1  |  |  |  |  |  |
| WRN      |  |  |  |  |  |
| CA9      |  |  |  |  |  |
| CASP9    |  |  |  |  |  |
| SOCS1    |  |  |  |  |  |
| CCNB1    |  |  |  |  |  |
| TNFAIP3  |  |  |  |  |  |
| S100A4   |  |  |  |  |  |
| EPCAM    |  |  |  |  |  |
| OLR1     |  |  |  |  |  |
| NR1H2    |  |  |  |  |  |
| TOP1     |  |  |  |  |  |

|         |  |  |  |  |  |
|---------|--|--|--|--|--|
| ROCK1   |  |  |  |  |  |
| BCL6    |  |  |  |  |  |
| MUTYH   |  |  |  |  |  |
| DNMT3B  |  |  |  |  |  |
| YBX1    |  |  |  |  |  |
| PTPRC   |  |  |  |  |  |
| TPH2    |  |  |  |  |  |
| ABO     |  |  |  |  |  |
| PTPN1   |  |  |  |  |  |
| LIPC    |  |  |  |  |  |
| PPARD   |  |  |  |  |  |
| XPO1    |  |  |  |  |  |
| MSH6    |  |  |  |  |  |
| KL      |  |  |  |  |  |
| SOX9    |  |  |  |  |  |
| NF2     |  |  |  |  |  |
| GZMB    |  |  |  |  |  |
| CHGA    |  |  |  |  |  |
| BTK     |  |  |  |  |  |
| ABCC2   |  |  |  |  |  |
| PDGFB   |  |  |  |  |  |
| ALDH1A1 |  |  |  |  |  |
| GPX1    |  |  |  |  |  |
| BST2    |  |  |  |  |  |
| ITGA5   |  |  |  |  |  |
| RPS6KB1 |  |  |  |  |  |
| XRCC6   |  |  |  |  |  |
| IL12A   |  |  |  |  |  |
| NTRK1   |  |  |  |  |  |

|           |  |  |  |  |  |
|-----------|--|--|--|--|--|
| L1CAM     |  |  |  |  |  |
| CTSD      |  |  |  |  |  |
| NCOA3     |  |  |  |  |  |
| XRCC5     |  |  |  |  |  |
| CX3CR1    |  |  |  |  |  |
| ALOX5     |  |  |  |  |  |
| MIR145    |  |  |  |  |  |
| KLF4      |  |  |  |  |  |
| LYN       |  |  |  |  |  |
| PKD1      |  |  |  |  |  |
| CDKN2B    |  |  |  |  |  |
| ERBB4     |  |  |  |  |  |
| NTRK2     |  |  |  |  |  |
| PKM       |  |  |  |  |  |
| PLCG1     |  |  |  |  |  |
| PGF       |  |  |  |  |  |
| MAP2K1    |  |  |  |  |  |
| GC        |  |  |  |  |  |
| CD38      |  |  |  |  |  |
| NGFR      |  |  |  |  |  |
| NES       |  |  |  |  |  |
| HSD11B1   |  |  |  |  |  |
| TNFRSF10B |  |  |  |  |  |
| SAA1      |  |  |  |  |  |
| IL22      |  |  |  |  |  |
| PRKAA1    |  |  |  |  |  |
| ID1       |  |  |  |  |  |
| ANXA1     |  |  |  |  |  |
| GLI1      |  |  |  |  |  |

|          |  |  |  |  |  |
|----------|--|--|--|--|--|
| CXCR2    |  |  |  |  |  |
| STAT6    |  |  |  |  |  |
| PTCH1    |  |  |  |  |  |
| MUC16    |  |  |  |  |  |
| MMP13    |  |  |  |  |  |
| UCHL1    |  |  |  |  |  |
| HLA-E    |  |  |  |  |  |
| ILK      |  |  |  |  |  |
| MTRR     |  |  |  |  |  |
| ANGPT1   |  |  |  |  |  |
| IGFBP1   |  |  |  |  |  |
| CSF2     |  |  |  |  |  |
| SERPINB5 |  |  |  |  |  |
| STAT5A   |  |  |  |  |  |
| KISS1    |  |  |  |  |  |
| DNMT3A   |  |  |  |  |  |
| AICDA    |  |  |  |  |  |
| FASN     |  |  |  |  |  |
| PTGS1    |  |  |  |  |  |
| CRHR1    |  |  |  |  |  |
| MYB      |  |  |  |  |  |
| ZEB1     |  |  |  |  |  |
| TNC      |  |  |  |  |  |
| CD24     |  |  |  |  |  |
| HDAC3    |  |  |  |  |  |
| CCR7     |  |  |  |  |  |
| CEACAM1  |  |  |  |  |  |
| BMP7     |  |  |  |  |  |
| EPHA2    |  |  |  |  |  |



|        |  |  |  |  |  |
|--------|--|--|--|--|--|
| IRF1   |  |  |  |  |  |
| INHBA  |  |  |  |  |  |
| CD55   |  |  |  |  |  |
| BLM    |  |  |  |  |  |
| PTTG1  |  |  |  |  |  |
| IDH2   |  |  |  |  |  |
| MTDH   |  |  |  |  |  |
| CXCR3  |  |  |  |  |  |
| HMGA1  |  |  |  |  |  |
| SPINK1 |  |  |  |  |  |
| JAK1   |  |  |  |  |  |
| PEBP1  |  |  |  |  |  |
| S100A8 |  |  |  |  |  |
| STAT5B |  |  |  |  |  |
| FBXW7  |  |  |  |  |  |
| DPYD   |  |  |  |  |  |
| RARB   |  |  |  |  |  |
| GSN    |  |  |  |  |  |
| PXN    |  |  |  |  |  |
| JAG1   |  |  |  |  |  |
| HAVCR2 |  |  |  |  |  |
| CIITA  |  |  |  |  |  |
| KITLG  |  |  |  |  |  |
| PDPN   |  |  |  |  |  |
| IL23A  |  |  |  |  |  |
| CSF1   |  |  |  |  |  |
| CA2    |  |  |  |  |  |
| STMN1  |  |  |  |  |  |
| NANOG  |  |  |  |  |  |

|        |  |  |  |  |  |
|--------|--|--|--|--|--|
| PPP2CA |  |  |  |  |  |
| IGFBP2 |  |  |  |  |  |
| CTTN   |  |  |  |  |  |
| NRP1   |  |  |  |  |  |
| NAT1   |  |  |  |  |  |
| KRT19  |  |  |  |  |  |
| SPHK1  |  |  |  |  |  |
| ANG    |  |  |  |  |  |
| AKT2   |  |  |  |  |  |
| KRT18  |  |  |  |  |  |
| DCN    |  |  |  |  |  |
| STUB1  |  |  |  |  |  |
| CYR61  |  |  |  |  |  |
| STAT4  |  |  |  |  |  |
| FABP2  |  |  |  |  |  |
| AGTR2  |  |  |  |  |  |
| RAN    |  |  |  |  |  |
| CAPN10 |  |  |  |  |  |
| TGFA   |  |  |  |  |  |
| GATA4  |  |  |  |  |  |
| XPB1   |  |  |  |  |  |
| EWSR1  |  |  |  |  |  |
| CASP1  |  |  |  |  |  |
| CLOCK  |  |  |  |  |  |
| ITGA6  |  |  |  |  |  |
| NDRG1  |  |  |  |  |  |
| ITGB4  |  |  |  |  |  |
| POLB   |  |  |  |  |  |
| BDKRB2 |  |  |  |  |  |

|          |  |  |  |  |  |
|----------|--|--|--|--|--|
| EDNRB    |  |  |  |  |  |
| DAPK1    |  |  |  |  |  |
| SNAI2    |  |  |  |  |  |
| TEK      |  |  |  |  |  |
| FLT4     |  |  |  |  |  |
| CD247    |  |  |  |  |  |
| FGFR4    |  |  |  |  |  |
| ERCC5    |  |  |  |  |  |
| SULT1A1  |  |  |  |  |  |
| CEACAM5  |  |  |  |  |  |
| ALOX15   |  |  |  |  |  |
| CTNND1   |  |  |  |  |  |
| ADD1     |  |  |  |  |  |
| ADH1C    |  |  |  |  |  |
| BAD      |  |  |  |  |  |
| CLDN1    |  |  |  |  |  |
| CTSL     |  |  |  |  |  |
| CD9      |  |  |  |  |  |
| EIF4EBP1 |  |  |  |  |  |
| TAC1     |  |  |  |  |  |
| KPNA2    |  |  |  |  |  |
| CDK6     |  |  |  |  |  |
| PDCD4    |  |  |  |  |  |
| KEAP1    |  |  |  |  |  |
| MTA1     |  |  |  |  |  |
| FOLH1    |  |  |  |  |  |
| XPA      |  |  |  |  |  |
| HSD11B2  |  |  |  |  |  |
| GSTA1    |  |  |  |  |  |

|           |  |  |  |  |  |
|-----------|--|--|--|--|--|
| DIABLO    |  |  |  |  |  |
| AXL       |  |  |  |  |  |
| PLA2G4A   |  |  |  |  |  |
| TACR1     |  |  |  |  |  |
| PF4       |  |  |  |  |  |
| TYMP      |  |  |  |  |  |
| RIPK1     |  |  |  |  |  |
| NR4A1     |  |  |  |  |  |
| TNFRSF10A |  |  |  |  |  |
| IGF2R     |  |  |  |  |  |
| CXCL1     |  |  |  |  |  |
| CCL20     |  |  |  |  |  |
| CD86      |  |  |  |  |  |
| MIR126    |  |  |  |  |  |
| MRE11A    |  |  |  |  |  |
| IL27      |  |  |  |  |  |
| TFAP2A    |  |  |  |  |  |
| SDHB      |  |  |  |  |  |
| RASA1     |  |  |  |  |  |
| MAD2L1    |  |  |  |  |  |
| LOX       |  |  |  |  |  |
| SFN       |  |  |  |  |  |
| KDM1A     |  |  |  |  |  |
| CSK       |  |  |  |  |  |
| ATF3      |  |  |  |  |  |
| LCT       |  |  |  |  |  |
| HNRNPA1   |  |  |  |  |  |
| IRS2      |  |  |  |  |  |
| XRCC4     |  |  |  |  |  |

|          |  |  |  |  |  |
|----------|--|--|--|--|--|
| ADIPOR1  |  |  |  |  |  |
| CD82     |  |  |  |  |  |
| TSC1     |  |  |  |  |  |
| LEF1     |  |  |  |  |  |
| TP53BP1  |  |  |  |  |  |
| CYLD     |  |  |  |  |  |
| BIRC3    |  |  |  |  |  |
| MFN2     |  |  |  |  |  |
| TLR5     |  |  |  |  |  |
| SFRP1    |  |  |  |  |  |
| SLC19A1  |  |  |  |  |  |
| MDK      |  |  |  |  |  |
| ITGA3    |  |  |  |  |  |
| CDH13    |  |  |  |  |  |
| CADM1    |  |  |  |  |  |
| PKD2     |  |  |  |  |  |
| HIST3H3  |  |  |  |  |  |
| MIR221   |  |  |  |  |  |
| TCF4     |  |  |  |  |  |
| TNFSF13  |  |  |  |  |  |
| GATA2    |  |  |  |  |  |
| CYP24A1  |  |  |  |  |  |
| MUC2     |  |  |  |  |  |
| HOTAIR   |  |  |  |  |  |
| SLC9A3R1 |  |  |  |  |  |
| HNRNPK   |  |  |  |  |  |
| TCF3     |  |  |  |  |  |
| ARF6     |  |  |  |  |  |
| FSCN1    |  |  |  |  |  |

|          |  |  |  |  |  |
|----------|--|--|--|--|--|
| PRLR     |  |  |  |  |  |
| ZEB2     |  |  |  |  |  |
| WNT1     |  |  |  |  |  |
| NOTCH2   |  |  |  |  |  |
| IL32     |  |  |  |  |  |
| CSNK2B   |  |  |  |  |  |
| PITX2    |  |  |  |  |  |
| KLF6     |  |  |  |  |  |
| ABCC4    |  |  |  |  |  |
| HMGCR    |  |  |  |  |  |
| FEN1     |  |  |  |  |  |
| TNFSF12  |  |  |  |  |  |
| CD80     |  |  |  |  |  |
| ERCC4    |  |  |  |  |  |
| PDX1     |  |  |  |  |  |
| NR4A2    |  |  |  |  |  |
| MAP1LC3A |  |  |  |  |  |
| KAT5     |  |  |  |  |  |
| CGA      |  |  |  |  |  |
| ANGPTL4  |  |  |  |  |  |
| RAB5A    |  |  |  |  |  |
| TUBB3    |  |  |  |  |  |
| COL4A5   |  |  |  |  |  |
| ARG1     |  |  |  |  |  |
| FANCD2   |  |  |  |  |  |
| MIR27A   |  |  |  |  |  |
| NCOA2    |  |  |  |  |  |
| ACKR3    |  |  |  |  |  |
| ZFP36    |  |  |  |  |  |

|         |  |  |  |  |  |
|---------|--|--|--|--|--|
| BUB1B   |  |  |  |  |  |
| MAPK9   |  |  |  |  |  |
| S1PR1   |  |  |  |  |  |
| NEDD4L  |  |  |  |  |  |
| PTP4A3  |  |  |  |  |  |
| POU2F1  |  |  |  |  |  |
| CXCR1   |  |  |  |  |  |
| RAD50   |  |  |  |  |  |
| CDC20   |  |  |  |  |  |
| ARID1A  |  |  |  |  |  |
| APAF1   |  |  |  |  |  |
| TSPO    |  |  |  |  |  |
| BBC3    |  |  |  |  |  |
| TPM1    |  |  |  |  |  |
| ITLN1   |  |  |  |  |  |
| CXCL13  |  |  |  |  |  |
| ALCAM   |  |  |  |  |  |
| GAS6    |  |  |  |  |  |
| MMP12   |  |  |  |  |  |
| MIR200C |  |  |  |  |  |
| TFPI2   |  |  |  |  |  |
| CASP7   |  |  |  |  |  |
| UGT2B7  |  |  |  |  |  |
| IL16    |  |  |  |  |  |
| MIR210  |  |  |  |  |  |
| ENPP2   |  |  |  |  |  |
| PMS2    |  |  |  |  |  |
| COPS5   |  |  |  |  |  |
| PSCA    |  |  |  |  |  |

|          |  |  |  |  |  |
|----------|--|--|--|--|--|
| BAG1     |  |  |  |  |  |
| SATB1    |  |  |  |  |  |
| JUP      |  |  |  |  |  |
| MST1R    |  |  |  |  |  |
| MAP2K4   |  |  |  |  |  |
| UGT1A9   |  |  |  |  |  |
| ANPEP    |  |  |  |  |  |
| DLC1     |  |  |  |  |  |
| ARNT     |  |  |  |  |  |
| TNFRSF6B |  |  |  |  |  |
| IL17F    |  |  |  |  |  |
| HSD17B1  |  |  |  |  |  |
| KLF5     |  |  |  |  |  |
| USP7     |  |  |  |  |  |
| PDIA3    |  |  |  |  |  |
| PTGER4   |  |  |  |  |  |
| UNG      |  |  |  |  |  |
| ALOX12   |  |  |  |  |  |
| ANO1     |  |  |  |  |  |
| CCR6     |  |  |  |  |  |
| MIR223   |  |  |  |  |  |
| MIR196A2 |  |  |  |  |  |
| MCM2     |  |  |  |  |  |
| HSPA9    |  |  |  |  |  |
| FGF7     |  |  |  |  |  |
| THPO     |  |  |  |  |  |
| FUT2     |  |  |  |  |  |
| MYOD1    |  |  |  |  |  |
| RGS2     |  |  |  |  |  |



|         |  |  |  |  |  |
|---------|--|--|--|--|--|
| BNIP3   |  |  |  |  |  |
| LDHA    |  |  |  |  |  |
| RTN4    |  |  |  |  |  |
| NT5E    |  |  |  |  |  |
| GLUD1   |  |  |  |  |  |
| MECOM   |  |  |  |  |  |
| CCND2   |  |  |  |  |  |
| ATG16L1 |  |  |  |  |  |
| MAPK7   |  |  |  |  |  |
| PRDX2   |  |  |  |  |  |
| RFC1    |  |  |  |  |  |
| FOXP1   |  |  |  |  |  |
| SET     |  |  |  |  |  |
| MIR29A  |  |  |  |  |  |
| LGR5    |  |  |  |  |  |
| MIR17   |  |  |  |  |  |
| ESRRA   |  |  |  |  |  |
| BIRC7   |  |  |  |  |  |
| TFF3    |  |  |  |  |  |
| DDX3X   |  |  |  |  |  |
| RPSA    |  |  |  |  |  |
| HPGD    |  |  |  |  |  |
| IGFBP7  |  |  |  |  |  |
| FOLR1   |  |  |  |  |  |
| UHRF1   |  |  |  |  |  |
| WNT3A   |  |  |  |  |  |
| LAMC2   |  |  |  |  |  |
| TIAM1   |  |  |  |  |  |
| RECK    |  |  |  |  |  |

|         |  |  |  |  |  |
|---------|--|--|--|--|--|
| AMACR   |  |  |  |  |  |
| MIR31   |  |  |  |  |  |
| EPHB2   |  |  |  |  |  |
| GATA6   |  |  |  |  |  |
| SLC3A2  |  |  |  |  |  |
| MAP2K2  |  |  |  |  |  |
| PTGES   |  |  |  |  |  |
| TTK     |  |  |  |  |  |
| GLI3    |  |  |  |  |  |
| PLD2    |  |  |  |  |  |
| SLCO1B3 |  |  |  |  |  |
| ZBTB16  |  |  |  |  |  |
| PLD1    |  |  |  |  |  |
| LIG4    |  |  |  |  |  |
| SF3B1   |  |  |  |  |  |
| PLCE1   |  |  |  |  |  |
| SLIT2   |  |  |  |  |  |
| FOXC2   |  |  |  |  |  |
| MIR203A |  |  |  |  |  |
| DEK     |  |  |  |  |  |
| CLDN4   |  |  |  |  |  |
| PYCARD  |  |  |  |  |  |
| ITGA1   |  |  |  |  |  |
| GAL     |  |  |  |  |  |
| NDRG2   |  |  |  |  |  |
| ROCK2   |  |  |  |  |  |
| MIR143  |  |  |  |  |  |
| CCL21   |  |  |  |  |  |
| MIR205  |  |  |  |  |  |

|           |  |  |  |  |  |
|-----------|--|--|--|--|--|
| ST14      |  |  |  |  |  |
| EPHB4     |  |  |  |  |  |
| PRKAA2    |  |  |  |  |  |
| LY96      |  |  |  |  |  |
| PKLR      |  |  |  |  |  |
| MCM7      |  |  |  |  |  |
| FAP       |  |  |  |  |  |
| PTPA      |  |  |  |  |  |
| SLC22A4   |  |  |  |  |  |
| KIAA1524  |  |  |  |  |  |
| SULF1     |  |  |  |  |  |
| CD8A      |  |  |  |  |  |
| NTRK3     |  |  |  |  |  |
| GAST      |  |  |  |  |  |
| PTGER2    |  |  |  |  |  |
| PPM1D     |  |  |  |  |  |
| CXCL5     |  |  |  |  |  |
| MIRLET7A1 |  |  |  |  |  |
| HHEX      |  |  |  |  |  |
| BRIP1     |  |  |  |  |  |
| NR1H2     |  |  |  |  |  |
| DROSHA    |  |  |  |  |  |
| CDH3      |  |  |  |  |  |
| FADS2     |  |  |  |  |  |
| TMSB4X    |  |  |  |  |  |
| SNCG      |  |  |  |  |  |
| EHMT2     |  |  |  |  |  |
| ARHGDIA   |  |  |  |  |  |
| CYCS      |  |  |  |  |  |

|         |  |  |  |  |  |
|---------|--|--|--|--|--|
| BMPR1A  |  |  |  |  |  |
| MIR137  |  |  |  |  |  |
| DKC1    |  |  |  |  |  |
| CCL18   |  |  |  |  |  |
| ING1    |  |  |  |  |  |
| EFEMP1  |  |  |  |  |  |
| FADS1   |  |  |  |  |  |
| TNFRSF9 |  |  |  |  |  |
| E2F3    |  |  |  |  |  |
| COX2    |  |  |  |  |  |
| TACSTD2 |  |  |  |  |  |
| MIR16-1 |  |  |  |  |  |
| WIF1    |  |  |  |  |  |
| HES1    |  |  |  |  |  |
| CD276   |  |  |  |  |  |
| AGR2    |  |  |  |  |  |
| TCN2    |  |  |  |  |  |
| FHL2    |  |  |  |  |  |
| NTN1    |  |  |  |  |  |
| MASP2   |  |  |  |  |  |
| LIN28A  |  |  |  |  |  |
| HOXB13  |  |  |  |  |  |
| RHOB    |  |  |  |  |  |
| LTC4S   |  |  |  |  |  |
| MIR499A |  |  |  |  |  |
| CAMK2G  |  |  |  |  |  |
| CEACAM6 |  |  |  |  |  |
| EFNB2   |  |  |  |  |  |
| SLC5A1  |  |  |  |  |  |

|           |  |  |  |  |  |
|-----------|--|--|--|--|--|
| UBE2C     |  |  |  |  |  |
| TPP1      |  |  |  |  |  |
| ADIPOR2   |  |  |  |  |  |
| SERPINA12 |  |  |  |  |  |
| WNK1      |  |  |  |  |  |
| PER2      |  |  |  |  |  |
| XRCC2     |  |  |  |  |  |
| ODC1      |  |  |  |  |  |
| KLK6      |  |  |  |  |  |
| SOX4      |  |  |  |  |  |
| MALAT1    |  |  |  |  |  |
| UGT1A6    |  |  |  |  |  |
| TK1       |  |  |  |  |  |
| BGN       |  |  |  |  |  |
| TPSAB1    |  |  |  |  |  |
| CHFR      |  |  |  |  |  |
| PROZ      |  |  |  |  |  |
| MACC1     |  |  |  |  |  |
| CES1      |  |  |  |  |  |
| BUB1      |  |  |  |  |  |
| PMAIP1    |  |  |  |  |  |
| SMO       |  |  |  |  |  |
| CD226     |  |  |  |  |  |
| FLCN      |  |  |  |  |  |
| AKR1B10   |  |  |  |  |  |
| S100P     |  |  |  |  |  |
| ADORA3    |  |  |  |  |  |
| PTMA      |  |  |  |  |  |
| VTCN1     |  |  |  |  |  |

|          |  |  |  |  |  |
|----------|--|--|--|--|--|
| Septin9  |  |  |  |  |  |
| MIR200B  |  |  |  |  |  |
| CCL22    |  |  |  |  |  |
| MIR125B1 |  |  |  |  |  |
| GREM1    |  |  |  |  |  |
| CASP10   |  |  |  |  |  |
| GAB2     |  |  |  |  |  |
| CARM1    |  |  |  |  |  |
| TNFRSF4  |  |  |  |  |  |
| ATG5     |  |  |  |  |  |
| NRP2     |  |  |  |  |  |
| MAP3K8   |  |  |  |  |  |
| BCL3     |  |  |  |  |  |
| HAX1     |  |  |  |  |  |
| SFPQ     |  |  |  |  |  |
| AXIN2    |  |  |  |  |  |
| CSNK1E   |  |  |  |  |  |
| MIR375   |  |  |  |  |  |
| NEK2     |  |  |  |  |  |
| STC1     |  |  |  |  |  |
| KIF2C    |  |  |  |  |  |
| TDGF1    |  |  |  |  |  |
| SEPP1    |  |  |  |  |  |
| TAS2R38  |  |  |  |  |  |
| AOC3     |  |  |  |  |  |
| RUVBL1   |  |  |  |  |  |
| PRKAR2A  |  |  |  |  |  |
| FOSL1    |  |  |  |  |  |
| PLCB1    |  |  |  |  |  |

|          |  |  |  |  |  |
|----------|--|--|--|--|--|
| SLC22A2  |  |  |  |  |  |
| EIF5A    |  |  |  |  |  |
| PLAGL1   |  |  |  |  |  |
| PTGIS    |  |  |  |  |  |
| REG1A    |  |  |  |  |  |
| MIR150   |  |  |  |  |  |
| FOXE1    |  |  |  |  |  |
| KISS1R   |  |  |  |  |  |
| TAPBP    |  |  |  |  |  |
| MIR124-1 |  |  |  |  |  |
| MIR125A  |  |  |  |  |  |
| EXO1     |  |  |  |  |  |
| E2F4     |  |  |  |  |  |
| MIR200A  |  |  |  |  |  |
| FUT3     |  |  |  |  |  |
| SUV39H1  |  |  |  |  |  |
| ABCC3    |  |  |  |  |  |
| KRT20    |  |  |  |  |  |
| S100A10  |  |  |  |  |  |
| SAT1     |  |  |  |  |  |
| SIX1     |  |  |  |  |  |
| SUZ12    |  |  |  |  |  |
| MIR148A  |  |  |  |  |  |
| SMC1A    |  |  |  |  |  |
| ATP2B4   |  |  |  |  |  |
| CTNNBIP1 |  |  |  |  |  |
| NUDT1    |  |  |  |  |  |
| APOD     |  |  |  |  |  |
| TRIB3    |  |  |  |  |  |

|          |  |  |  |  |  |
|----------|--|--|--|--|--|
| MIR10B   |  |  |  |  |  |
| MIR182   |  |  |  |  |  |
| HMMR     |  |  |  |  |  |
| RRM2     |  |  |  |  |  |
| PEX5     |  |  |  |  |  |
| PSME3    |  |  |  |  |  |
| PSMD10   |  |  |  |  |  |
| LAPTM4B  |  |  |  |  |  |
| NODAL    |  |  |  |  |  |
| LUM      |  |  |  |  |  |
| RPS6     |  |  |  |  |  |
| CLIC1    |  |  |  |  |  |
| ST6GAL1  |  |  |  |  |  |
| MBD2     |  |  |  |  |  |
| PTPRJ    |  |  |  |  |  |
| MTNR1A   |  |  |  |  |  |
| MARCKS   |  |  |  |  |  |
| PAK4     |  |  |  |  |  |
| NUMB     |  |  |  |  |  |
| UGT1A7   |  |  |  |  |  |
| AIMP1    |  |  |  |  |  |
| ACVR2A   |  |  |  |  |  |
| CLDN7    |  |  |  |  |  |
| MIR214   |  |  |  |  |  |
| FES      |  |  |  |  |  |
| MYBL2    |  |  |  |  |  |
| SLC46A1  |  |  |  |  |  |
| LIN28B   |  |  |  |  |  |
| LGALS3BP |  |  |  |  |  |



|        |  |  |  |  |  |
|--------|--|--|--|--|--|
| MIR206 |  |  |  |  |  |
| MAD1L1 |  |  |  |  |  |
| MIR141 |  |  |  |  |  |
| FOXO4  |  |  |  |  |  |
| MSI1   |  |  |  |  |  |
| NPR1   |  |  |  |  |  |
| ID4    |  |  |  |  |  |
| DPYSL2 |  |  |  |  |  |
| RAD18  |  |  |  |  |  |
| MAPRE1 |  |  |  |  |  |
| MPG    |  |  |  |  |  |
| POLE   |  |  |  |  |  |
| RALA   |  |  |  |  |  |
| MTAP   |  |  |  |  |  |
| TDG    |  |  |  |  |  |
| MIR15A |  |  |  |  |  |
| PODXL  |  |  |  |  |  |
| PKHD1  |  |  |  |  |  |
| PLIN2  |  |  |  |  |  |
| HSPB2  |  |  |  |  |  |
| CBFB   |  |  |  |  |  |
| MSH3   |  |  |  |  |  |
| KCNH1  |  |  |  |  |  |
| MST1   |  |  |  |  |  |
| PELP1  |  |  |  |  |  |
| PLSCR1 |  |  |  |  |  |
| EGLN3  |  |  |  |  |  |
| GRP    |  |  |  |  |  |
| ETV4   |  |  |  |  |  |

|          |  |  |  |  |  |
|----------|--|--|--|--|--|
| ITGB6    |  |  |  |  |  |
| F2RL3    |  |  |  |  |  |
| TRAP1    |  |  |  |  |  |
| SYP      |  |  |  |  |  |
| PPP1R13L |  |  |  |  |  |
| MIR30A   |  |  |  |  |  |
| LATS2    |  |  |  |  |  |
| TPX2     |  |  |  |  |  |
| RACGAP1  |  |  |  |  |  |
| REG4     |  |  |  |  |  |
| SLC10A2  |  |  |  |  |  |
| B4GALT1  |  |  |  |  |  |
| LAMA5    |  |  |  |  |  |
| CXCR5    |  |  |  |  |  |
| TNFAIP6  |  |  |  |  |  |
| POLD1    |  |  |  |  |  |
| TAGLN    |  |  |  |  |  |
| TDP1     |  |  |  |  |  |
| IMPDH2   |  |  |  |  |  |
| APTX     |  |  |  |  |  |
| AMFR     |  |  |  |  |  |
| NCF4     |  |  |  |  |  |
| AKAP12   |  |  |  |  |  |
| RAD21    |  |  |  |  |  |
| CCR4     |  |  |  |  |  |
| GNA13    |  |  |  |  |  |
| GLS      |  |  |  |  |  |
| MEIS1    |  |  |  |  |  |
| CBX3     |  |  |  |  |  |

|          |  |  |  |  |  |
|----------|--|--|--|--|--|
| MIR22    |  |  |  |  |  |
| RORC     |  |  |  |  |  |
| SFRP2    |  |  |  |  |  |
| CLDN3    |  |  |  |  |  |
| NNMT     |  |  |  |  |  |
| IL13RA2  |  |  |  |  |  |
| NDUFA13  |  |  |  |  |  |
| NEIL1    |  |  |  |  |  |
| ECT2     |  |  |  |  |  |
| T        |  |  |  |  |  |
| ESM1     |  |  |  |  |  |
| DVL1     |  |  |  |  |  |
| MIR218-1 |  |  |  |  |  |
| PTGDR    |  |  |  |  |  |
| MIR199A1 |  |  |  |  |  |
| ZBTB7A   |  |  |  |  |  |
| MIR451A  |  |  |  |  |  |
| CXCL14   |  |  |  |  |  |
| WWTR1    |  |  |  |  |  |
| PPP2R2B  |  |  |  |  |  |
| CEBPD    |  |  |  |  |  |
| FUT4     |  |  |  |  |  |
| XAF1     |  |  |  |  |  |
| TIA1     |  |  |  |  |  |
| KLK7     |  |  |  |  |  |
| MIR26A1  |  |  |  |  |  |
| AQP9     |  |  |  |  |  |
| MIR100   |  |  |  |  |  |
| ATP5B    |  |  |  |  |  |

|          |  |  |  |  |  |
|----------|--|--|--|--|--|
| PSMD9    |  |  |  |  |  |
| LIFR     |  |  |  |  |  |
| RICTOR   |  |  |  |  |  |
| MMP11    |  |  |  |  |  |
| WISP1    |  |  |  |  |  |
| TARBP2   |  |  |  |  |  |
| LOXL2    |  |  |  |  |  |
| KDM5B    |  |  |  |  |  |
| PTGDR2   |  |  |  |  |  |
| MAL      |  |  |  |  |  |
| MT-ND2   |  |  |  |  |  |
| USP22    |  |  |  |  |  |
| MIR195   |  |  |  |  |  |
| HIF1AN   |  |  |  |  |  |
| LAMB1    |  |  |  |  |  |
| TJP2     |  |  |  |  |  |
| MIR181A1 |  |  |  |  |  |
| S100A11  |  |  |  |  |  |
| PIAS3    |  |  |  |  |  |
| WNT7A    |  |  |  |  |  |
| STK4     |  |  |  |  |  |
| CCDC88A  |  |  |  |  |  |
| SOCS2    |  |  |  |  |  |
| LRIG1    |  |  |  |  |  |
| PROK1    |  |  |  |  |  |
| SOX17    |  |  |  |  |  |
| SLC16A4  |  |  |  |  |  |
| IGFBP6   |  |  |  |  |  |
| CCAR2    |  |  |  |  |  |

|         |  |  |  |  |  |
|---------|--|--|--|--|--|
| UBD     |  |  |  |  |  |
| TFF2    |  |  |  |  |  |
| DSC2    |  |  |  |  |  |
| GOLPH3  |  |  |  |  |  |
| FUT1    |  |  |  |  |  |
| AGA     |  |  |  |  |  |
| NR2F2   |  |  |  |  |  |
| MBNL1   |  |  |  |  |  |
| QKI     |  |  |  |  |  |
| MIR34C  |  |  |  |  |  |
| MYH11   |  |  |  |  |  |
| MIR132  |  |  |  |  |  |
| AIM2    |  |  |  |  |  |
| HYAL1   |  |  |  |  |  |
| PSMA7   |  |  |  |  |  |
| TET1    |  |  |  |  |  |
| ACTR2   |  |  |  |  |  |
| HTATIP2 |  |  |  |  |  |
| SLC1A5  |  |  |  |  |  |
| MMP26   |  |  |  |  |  |
| FGF8    |  |  |  |  |  |
| SYNE1   |  |  |  |  |  |
| TNFSF9  |  |  |  |  |  |
| CSE1L   |  |  |  |  |  |
| LASP1   |  |  |  |  |  |
| SRI     |  |  |  |  |  |
| FUCA1   |  |  |  |  |  |
| PRSS8   |  |  |  |  |  |
| ADAM8   |  |  |  |  |  |

|         |  |  |  |  |  |
|---------|--|--|--|--|--|
| MEG3    |  |  |  |  |  |
| LCP1    |  |  |  |  |  |
| DDX6    |  |  |  |  |  |
| SLC22A3 |  |  |  |  |  |
| CHKA    |  |  |  |  |  |
| KLK10   |  |  |  |  |  |
| WARS    |  |  |  |  |  |
| MIR204  |  |  |  |  |  |
| MIR9-1  |  |  |  |  |  |
| CDC7    |  |  |  |  |  |
| DVL2    |  |  |  |  |  |
| ABI1    |  |  |  |  |  |
| PPP2R2A |  |  |  |  |  |
| MIR19A  |  |  |  |  |  |
| HMGB2   |  |  |  |  |  |
| ACLY    |  |  |  |  |  |
| MIR1-1  |  |  |  |  |  |
| MIR224  |  |  |  |  |  |
| PLCD1   |  |  |  |  |  |
| FPGS    |  |  |  |  |  |
| MIR96   |  |  |  |  |  |
| WISP3   |  |  |  |  |  |
| SPINT1  |  |  |  |  |  |
| WNT2    |  |  |  |  |  |
| UMPS    |  |  |  |  |  |
| SEL1L   |  |  |  |  |  |
| MIR149  |  |  |  |  |  |
| CSMD1   |  |  |  |  |  |
| MIR93   |  |  |  |  |  |

|          |  |  |  |  |  |
|----------|--|--|--|--|--|
| MIR34B   |  |  |  |  |  |
| BACH1    |  |  |  |  |  |
| SATB2    |  |  |  |  |  |
| HSPE1    |  |  |  |  |  |
| CRY1     |  |  |  |  |  |
| ADGRE5   |  |  |  |  |  |
| CRY2     |  |  |  |  |  |
| MIR23A   |  |  |  |  |  |
| EREG     |  |  |  |  |  |
| MIR29C   |  |  |  |  |  |
| ACY1     |  |  |  |  |  |
| GGH      |  |  |  |  |  |
| SLC7A11  |  |  |  |  |  |
| MIR335   |  |  |  |  |  |
| HNRNPH1  |  |  |  |  |  |
| RBFOX1   |  |  |  |  |  |
| TKTL1    |  |  |  |  |  |
| CPE      |  |  |  |  |  |
| GIPC1    |  |  |  |  |  |
| NLK      |  |  |  |  |  |
| RND3     |  |  |  |  |  |
| CDH17    |  |  |  |  |  |
| FRZB     |  |  |  |  |  |
| SELENBP1 |  |  |  |  |  |
| HVCN1    |  |  |  |  |  |
| GSTO2    |  |  |  |  |  |
| SPOP     |  |  |  |  |  |
| PINX1    |  |  |  |  |  |
| HIC1     |  |  |  |  |  |

|          |  |  |  |  |  |
|----------|--|--|--|--|--|
| MIR29B1  |  |  |  |  |  |
| ELF3     |  |  |  |  |  |
| PCDH10   |  |  |  |  |  |
| CYTH2    |  |  |  |  |  |
| MAGEA1   |  |  |  |  |  |
| THBS4    |  |  |  |  |  |
| CTSH     |  |  |  |  |  |
| OLFM4    |  |  |  |  |  |
| COL6A3   |  |  |  |  |  |
| PIWIL1   |  |  |  |  |  |
| SLC26A2  |  |  |  |  |  |
| ABCC5    |  |  |  |  |  |
| LRAT     |  |  |  |  |  |
| DCLK1    |  |  |  |  |  |
| UGT1A    |  |  |  |  |  |
| RECQL5   |  |  |  |  |  |
| ATF1     |  |  |  |  |  |
| POLR2F   |  |  |  |  |  |
| TPD52    |  |  |  |  |  |
| ADH7     |  |  |  |  |  |
| PITX1    |  |  |  |  |  |
| EED      |  |  |  |  |  |
| EPHA1    |  |  |  |  |  |
| MIR133A1 |  |  |  |  |  |
| GUCY2C   |  |  |  |  |  |
| STC2     |  |  |  |  |  |
| IFITM1   |  |  |  |  |  |
| VASH1    |  |  |  |  |  |
| PLS3     |  |  |  |  |  |



|          |  |  |  |  |  |
|----------|--|--|--|--|--|
| BUB3     |  |  |  |  |  |
| EPHB6    |  |  |  |  |  |
| TWIST2   |  |  |  |  |  |
| TIMP4    |  |  |  |  |  |
| PPP2R1B  |  |  |  |  |  |
| AURKC    |  |  |  |  |  |
| PHLPP1   |  |  |  |  |  |
| CASP4    |  |  |  |  |  |
| MIR24-1  |  |  |  |  |  |
| OSMR     |  |  |  |  |  |
| DSC3     |  |  |  |  |  |
| MIR378A  |  |  |  |  |  |
| DAB2IP   |  |  |  |  |  |
| STOML2   |  |  |  |  |  |
| DBP      |  |  |  |  |  |
| KLF8     |  |  |  |  |  |
| ANGPTL2  |  |  |  |  |  |
| SULF2    |  |  |  |  |  |
| ARID1B   |  |  |  |  |  |
| PTK7     |  |  |  |  |  |
| ARHGEF12 |  |  |  |  |  |
| SPHK2    |  |  |  |  |  |
| HNRNPF   |  |  |  |  |  |
| TACR2    |  |  |  |  |  |
| MIR494   |  |  |  |  |  |
| MELTF    |  |  |  |  |  |
| ANTXR1   |  |  |  |  |  |
| HNRNPM   |  |  |  |  |  |
| SEMA3F   |  |  |  |  |  |

|          |  |  |  |  |  |
|----------|--|--|--|--|--|
| PLA2G10  |  |  |  |  |  |
| MIR25    |  |  |  |  |  |
| RYR3     |  |  |  |  |  |
| ZNF148   |  |  |  |  |  |
| CES2     |  |  |  |  |  |
| PBK      |  |  |  |  |  |
| GAS5     |  |  |  |  |  |
| RPLP0    |  |  |  |  |  |
| TCF7     |  |  |  |  |  |
| MAP2K5   |  |  |  |  |  |
| CNOT7    |  |  |  |  |  |
| CASP8AP2 |  |  |  |  |  |
| MIR18A   |  |  |  |  |  |
| EPHA4    |  |  |  |  |  |
| ZNF217   |  |  |  |  |  |
| GATA5    |  |  |  |  |  |
| WNT10A   |  |  |  |  |  |
| ABCB5    |  |  |  |  |  |
| LGMN     |  |  |  |  |  |
| TRG      |  |  |  |  |  |
| EPHB1    |  |  |  |  |  |
| NPAS2    |  |  |  |  |  |
| SULT2B1  |  |  |  |  |  |
| EGFL7    |  |  |  |  |  |
| DUT      |  |  |  |  |  |
| MIR196A1 |  |  |  |  |  |
| KLF9     |  |  |  |  |  |
| ATOH1    |  |  |  |  |  |
| MIR133B  |  |  |  |  |  |

|        |  |  |  |  |  |
|--------|--|--|--|--|--|
| ST13   |  |  |  |  |  |
| ADM2   |  |  |  |  |  |
| MIR7-1 |  |  |  |  |  |
| DYX1C1 |  |  |  |  |  |
| DTL    |  |  |  |  |  |
| SGO1   |  |  |  |  |  |
| ATG7   |  |  |  |  |  |
| ANXA11 |  |  |  |  |  |
| MYCL   |  |  |  |  |  |
| MCRS1  |  |  |  |  |  |
| TUBB4B |  |  |  |  |  |
| HYAL2  |  |  |  |  |  |
| NOB1   |  |  |  |  |  |
| MGLL   |  |  |  |  |  |
| MIR144 |  |  |  |  |  |
| MIR140 |  |  |  |  |  |
| MIR185 |  |  |  |  |  |
| SESN2  |  |  |  |  |  |
| NEAT1  |  |  |  |  |  |
| DPP6   |  |  |  |  |  |
| MLH3   |  |  |  |  |  |
| FOXF1  |  |  |  |  |  |
| KMT2C  |  |  |  |  |  |
| ADRM1  |  |  |  |  |  |
| ZFX    |  |  |  |  |  |
| RASSF2 |  |  |  |  |  |
| DVL3   |  |  |  |  |  |
| ERBIN  |  |  |  |  |  |
| DSC1   |  |  |  |  |  |

|         |  |  |  |  |  |
|---------|--|--|--|--|--|
| COPS6   |  |  |  |  |  |
| KLK11   |  |  |  |  |  |
| SLC7A1  |  |  |  |  |  |
| DUSP4   |  |  |  |  |  |
| TFDP1   |  |  |  |  |  |
| HEY1    |  |  |  |  |  |
| SLC5A8  |  |  |  |  |  |
| ACO2    |  |  |  |  |  |
| TMPRSS4 |  |  |  |  |  |
| MIR92A1 |  |  |  |  |  |
| ERP29   |  |  |  |  |  |
| UVRAG   |  |  |  |  |  |
| SLCO2A1 |  |  |  |  |  |
| CLIC4   |  |  |  |  |  |
| NTHL1   |  |  |  |  |  |
| CDKN3   |  |  |  |  |  |
| FOXQ1   |  |  |  |  |  |
| WISP2   |  |  |  |  |  |
| MIR192  |  |  |  |  |  |
| IL13RA1 |  |  |  |  |  |
| MIR23B  |  |  |  |  |  |
| CDK2AP1 |  |  |  |  |  |
| NUP88   |  |  |  |  |  |
| MIR139  |  |  |  |  |  |
| CTNNA3  |  |  |  |  |  |
| MIR106A |  |  |  |  |  |
| CIAPIN1 |  |  |  |  |  |
| SIRT7   |  |  |  |  |  |
| MIR302A |  |  |  |  |  |

|           |  |  |  |  |  |
|-----------|--|--|--|--|--|
| PARVA     |  |  |  |  |  |
| PRKAG1    |  |  |  |  |  |
| MGEA5     |  |  |  |  |  |
| ADAM28    |  |  |  |  |  |
| PCGF2     |  |  |  |  |  |
| COL4A6    |  |  |  |  |  |
| WIPF1     |  |  |  |  |  |
| SERPINA10 |  |  |  |  |  |
| PROK2     |  |  |  |  |  |
| FZD7      |  |  |  |  |  |
| PARVB     |  |  |  |  |  |
| WASF3     |  |  |  |  |  |
| MIR212    |  |  |  |  |  |
| CDX1      |  |  |  |  |  |
| MIR128-1  |  |  |  |  |  |
| UCA1      |  |  |  |  |  |
| CASP5     |  |  |  |  |  |
| GSPT1     |  |  |  |  |  |
| CEACAM7   |  |  |  |  |  |
| ABHD5     |  |  |  |  |  |
| MIR320A   |  |  |  |  |  |
| CACYBP    |  |  |  |  |  |
| SNX9      |  |  |  |  |  |
| PIWIL2    |  |  |  |  |  |
| RGS6      |  |  |  |  |  |
| LIMK2     |  |  |  |  |  |
| MIR429    |  |  |  |  |  |
| C1GALT1C1 |  |  |  |  |  |
| PIK3R3    |  |  |  |  |  |

|          |  |  |  |  |  |
|----------|--|--|--|--|--|
| VNN1     |  |  |  |  |  |
| MIR99A   |  |  |  |  |  |
| RALB     |  |  |  |  |  |
| HSPB6    |  |  |  |  |  |
| SPG20    |  |  |  |  |  |
| TXNDC5   |  |  |  |  |  |
| EYA4     |  |  |  |  |  |
| KDM3A    |  |  |  |  |  |
| EFEMP2   |  |  |  |  |  |
| GAS1     |  |  |  |  |  |
| VTI1A    |  |  |  |  |  |
| MIR138-1 |  |  |  |  |  |
| MIR497   |  |  |  |  |  |
| TRO      |  |  |  |  |  |
| GPX2     |  |  |  |  |  |
| PDHX     |  |  |  |  |  |
| C2orf40  |  |  |  |  |  |
| UBE2M    |  |  |  |  |  |
| BIRC6    |  |  |  |  |  |
| NRCAM    |  |  |  |  |  |
| MIRLET7C |  |  |  |  |  |
| MMP16    |  |  |  |  |  |
| SETD1A   |  |  |  |  |  |
| XPO5     |  |  |  |  |  |
| KLK14    |  |  |  |  |  |
| BRAP     |  |  |  |  |  |
| SCG5     |  |  |  |  |  |
| RNF41    |  |  |  |  |  |
| BPTF     |  |  |  |  |  |

|         |  |  |  |  |  |
|---------|--|--|--|--|--|
| PUF60   |  |  |  |  |  |
| MIR193A |  |  |  |  |  |
| CDCA8   |  |  |  |  |  |
| MIR503  |  |  |  |  |  |
| MELK    |  |  |  |  |  |
| LRG1    |  |  |  |  |  |
| VANGL1  |  |  |  |  |  |
| SIPA1   |  |  |  |  |  |
| RGS16   |  |  |  |  |  |
| SLC16A7 |  |  |  |  |  |
| MIR130B |  |  |  |  |  |
| NOL3    |  |  |  |  |  |
| PMS1    |  |  |  |  |  |
| FGF20   |  |  |  |  |  |
| ECHS1   |  |  |  |  |  |
| SEMA3B  |  |  |  |  |  |
| ORM2    |  |  |  |  |  |
| AKAP10  |  |  |  |  |  |
| SF3A1   |  |  |  |  |  |
| FZD3    |  |  |  |  |  |
| MED19   |  |  |  |  |  |
| HBP1    |  |  |  |  |  |
| GALR1   |  |  |  |  |  |
| RIN1    |  |  |  |  |  |
| IST1    |  |  |  |  |  |
| PAK5    |  |  |  |  |  |
| EMP1    |  |  |  |  |  |
| USP4    |  |  |  |  |  |
| SYNE2   |  |  |  |  |  |

|         |  |  |  |  |  |
|---------|--|--|--|--|--|
| KIF18A  |  |  |  |  |  |
| RBM3    |  |  |  |  |  |
| MZF1    |  |  |  |  |  |
| PLA2G3  |  |  |  |  |  |
| EIF3H   |  |  |  |  |  |
| CTSZ    |  |  |  |  |  |
| CEACAM3 |  |  |  |  |  |
| NUCKS1  |  |  |  |  |  |
| CCL25   |  |  |  |  |  |
| PABPC4  |  |  |  |  |  |
| SUGT1   |  |  |  |  |  |
| MIR135B |  |  |  |  |  |
| ATP5J   |  |  |  |  |  |
| CTHRC1  |  |  |  |  |  |
| POLD3   |  |  |  |  |  |
| UNC5C   |  |  |  |  |  |
| CYP2S1  |  |  |  |  |  |
| ZBTB7B  |  |  |  |  |  |
| HPGDS   |  |  |  |  |  |
| TNS4    |  |  |  |  |  |
| CLDN18  |  |  |  |  |  |
| TMEM8B  |  |  |  |  |  |
| ACSL5   |  |  |  |  |  |
| LGALS4  |  |  |  |  |  |
| GRHL2   |  |  |  |  |  |
| LMO1    |  |  |  |  |  |
| MIR338  |  |  |  |  |  |
| LIMA1   |  |  |  |  |  |
| SMUG1   |  |  |  |  |  |



|          |  |  |  |  |  |
|----------|--|--|--|--|--|
| MGST1    |  |  |  |  |  |
| MT1F     |  |  |  |  |  |
| RNF43    |  |  |  |  |  |
| SCGB2A1  |  |  |  |  |  |
| MIR196B  |  |  |  |  |  |
| E2F5     |  |  |  |  |  |
| RPS6KA6  |  |  |  |  |  |
| MIR199A2 |  |  |  |  |  |
| S100A14  |  |  |  |  |  |
| KIN      |  |  |  |  |  |
| SPARCL1  |  |  |  |  |  |
| RAD54B   |  |  |  |  |  |
| RNF111   |  |  |  |  |  |
| NEIL2    |  |  |  |  |  |
| CDK5RAP3 |  |  |  |  |  |
| RETNLB   |  |  |  |  |  |
| LLGL1    |  |  |  |  |  |
| THOC1    |  |  |  |  |  |
| DUSP10   |  |  |  |  |  |
| KDM4B    |  |  |  |  |  |
| CEMP     |  |  |  |  |  |
| SOX7     |  |  |  |  |  |
| MEP1A    |  |  |  |  |  |
| LZTS1    |  |  |  |  |  |
| LHX4     |  |  |  |  |  |
| RRBP1    |  |  |  |  |  |
| FUT6     |  |  |  |  |  |
| MIR215   |  |  |  |  |  |
| ABCF1    |  |  |  |  |  |

|          |  |  |  |  |  |
|----------|--|--|--|--|--|
| ND2      |  |  |  |  |  |
| MT1G     |  |  |  |  |  |
| CBX7     |  |  |  |  |  |
| CYP2W1   |  |  |  |  |  |
| ATAD2    |  |  |  |  |  |
| ARL11    |  |  |  |  |  |
| SEC61B   |  |  |  |  |  |
| RGMA     |  |  |  |  |  |
| HOXB6    |  |  |  |  |  |
| MIR483   |  |  |  |  |  |
| GSTT2    |  |  |  |  |  |
| TFAP4    |  |  |  |  |  |
| ST8SIA2  |  |  |  |  |  |
| ZMIZ1    |  |  |  |  |  |
| PTPN14   |  |  |  |  |  |
| GLRX3    |  |  |  |  |  |
| RMI1     |  |  |  |  |  |
| BMP3     |  |  |  |  |  |
| MCC      |  |  |  |  |  |
| BAMBI    |  |  |  |  |  |
| CST1     |  |  |  |  |  |
| MIR124-3 |  |  |  |  |  |
| KIF2A    |  |  |  |  |  |
| NPRL2    |  |  |  |  |  |
| TPBG     |  |  |  |  |  |
| GCNT2    |  |  |  |  |  |
| AMBRA1   |  |  |  |  |  |
| ASCL2    |  |  |  |  |  |
| SUCLA2   |  |  |  |  |  |

|           |  |  |  |  |  |
|-----------|--|--|--|--|--|
| PTP4A2    |  |  |  |  |  |
| MTUS1     |  |  |  |  |  |
| SOCS6     |  |  |  |  |  |
| PTGES2    |  |  |  |  |  |
| MIR148B   |  |  |  |  |  |
| PTBP2     |  |  |  |  |  |
| GUCA2A    |  |  |  |  |  |
| SIRT4     |  |  |  |  |  |
| BCAT1     |  |  |  |  |  |
| FAM83H    |  |  |  |  |  |
| PRRX1     |  |  |  |  |  |
| HSP90AA2P |  |  |  |  |  |
| GJC1      |  |  |  |  |  |
| MYO1A     |  |  |  |  |  |
| MMP21     |  |  |  |  |  |
| BLCAP     |  |  |  |  |  |
| NKX2-3    |  |  |  |  |  |
| PTPRR     |  |  |  |  |  |
| MIEN1     |  |  |  |  |  |
| DUSP22    |  |  |  |  |  |
| SRSF10    |  |  |  |  |  |
| FAN1      |  |  |  |  |  |
| VMP1      |  |  |  |  |  |
| CITED1    |  |  |  |  |  |
| MIR423    |  |  |  |  |  |
| LRRFIP1   |  |  |  |  |  |
| SYNJ2     |  |  |  |  |  |
| UHRF2     |  |  |  |  |  |
| BATF2     |  |  |  |  |  |

|          |  |  |  |  |  |
|----------|--|--|--|--|--|
| PEBP4    |  |  |  |  |  |
| DKK4     |  |  |  |  |  |
| OTX1     |  |  |  |  |  |
| MOB1A    |  |  |  |  |  |
| EVL      |  |  |  |  |  |
| PDLIM1   |  |  |  |  |  |
| STYK1    |  |  |  |  |  |
| NDRG4    |  |  |  |  |  |
| LYPD3    |  |  |  |  |  |
| ARNTL2   |  |  |  |  |  |
| ADAMTS12 |  |  |  |  |  |
| ZG16B    |  |  |  |  |  |
| AJUBA    |  |  |  |  |  |
| ATG4B    |  |  |  |  |  |
| MIR135A1 |  |  |  |  |  |
| MIR211   |  |  |  |  |  |
| MIR129-2 |  |  |  |  |  |
| EPB41L2  |  |  |  |  |  |
| MIR218-2 |  |  |  |  |  |
| PES1     |  |  |  |  |  |
| SRPX2    |  |  |  |  |  |
| ADAM23   |  |  |  |  |  |
| HYAL3    |  |  |  |  |  |
| SSPN     |  |  |  |  |  |
| IL36A    |  |  |  |  |  |
| TUBB6    |  |  |  |  |  |
| ARID2    |  |  |  |  |  |
| FMNL2    |  |  |  |  |  |
| RAB22A   |  |  |  |  |  |

|          |  |  |  |  |  |
|----------|--|--|--|--|--|
| MIR24-2  |  |  |  |  |  |
| AKAP4    |  |  |  |  |  |
| DIS3     |  |  |  |  |  |
| PHLPP2   |  |  |  |  |  |
| TMEM97   |  |  |  |  |  |
| MIR197   |  |  |  |  |  |
| RCC2     |  |  |  |  |  |
| UPK1A    |  |  |  |  |  |
| MIR301A  |  |  |  |  |  |
| SLC39A14 |  |  |  |  |  |
| GDF11    |  |  |  |  |  |
| EFNA2    |  |  |  |  |  |
| MIR340   |  |  |  |  |  |
| RPL18    |  |  |  |  |  |
| ADCY2    |  |  |  |  |  |
| EEF1E1   |  |  |  |  |  |
| WHRN     |  |  |  |  |  |
| MIRLET7I |  |  |  |  |  |
| LMTK3    |  |  |  |  |  |
| CPEB4    |  |  |  |  |  |
| TNIK     |  |  |  |  |  |
| PSAT1    |  |  |  |  |  |
| MIR124-2 |  |  |  |  |  |
| PLA1A    |  |  |  |  |  |
| MED13L   |  |  |  |  |  |
| SH3GL3   |  |  |  |  |  |
| MIR372   |  |  |  |  |  |
| SEMA4A   |  |  |  |  |  |
| PRLHR    |  |  |  |  |  |

|          |  |  |  |  |  |
|----------|--|--|--|--|--|
| RFXANK   |  |  |  |  |  |
| PATZ1    |  |  |  |  |  |
| MED28    |  |  |  |  |  |
| GINS3    |  |  |  |  |  |
| CD3EAP   |  |  |  |  |  |
| TNS3     |  |  |  |  |  |
| TOM1L1   |  |  |  |  |  |
| ANGPTL6  |  |  |  |  |  |
| FAM3C    |  |  |  |  |  |
| BTF3     |  |  |  |  |  |
| MIR9-2   |  |  |  |  |  |
| PLAGL2   |  |  |  |  |  |
| CST5     |  |  |  |  |  |
| PFDN1    |  |  |  |  |  |
| NMNAT2   |  |  |  |  |  |
| RAD51AP1 |  |  |  |  |  |
| MIR9-3   |  |  |  |  |  |
| NEUROG1  |  |  |  |  |  |
| TRAK1    |  |  |  |  |  |
| SGPP1    |  |  |  |  |  |
| MANBA    |  |  |  |  |  |
| MIR365A  |  |  |  |  |  |
| IP6K2    |  |  |  |  |  |
| SIK3     |  |  |  |  |  |
| MIR675   |  |  |  |  |  |
| TBPL1    |  |  |  |  |  |
| MIR153-1 |  |  |  |  |  |
| FAM134B  |  |  |  |  |  |
| GMDS     |  |  |  |  |  |

|          |  |  |  |  |  |
|----------|--|--|--|--|--|
| MIR219A1 |  |  |  |  |  |
| TPST1    |  |  |  |  |  |
| CCAT2    |  |  |  |  |  |
| PPP1R3C  |  |  |  |  |  |
| TNFRSF19 |  |  |  |  |  |
| CDH10    |  |  |  |  |  |
| MIR1-2   |  |  |  |  |  |
| HIPK1    |  |  |  |  |  |
| BANCR    |  |  |  |  |  |
| REPIN1   |  |  |  |  |  |
| PDGFRL   |  |  |  |  |  |
| TAF1C    |  |  |  |  |  |
| GCNT3    |  |  |  |  |  |
| FGF6     |  |  |  |  |  |
| CLDN8    |  |  |  |  |  |
| MIR367   |  |  |  |  |  |
| SAPCD2   |  |  |  |  |  |
| TESC     |  |  |  |  |  |
| SLCO3A1  |  |  |  |  |  |
| MIR1246  |  |  |  |  |  |
| ZNF703   |  |  |  |  |  |
| FAM46A   |  |  |  |  |  |
| SLC35C1  |  |  |  |  |  |
| CBX8     |  |  |  |  |  |
| MIR129-1 |  |  |  |  |  |
| ATG10    |  |  |  |  |  |
| MIR491   |  |  |  |  |  |
| SCUBE2   |  |  |  |  |  |
| SYTL1    |  |  |  |  |  |

|          |  |  |  |  |  |
|----------|--|--|--|--|--|
| PGPEP1   |  |  |  |  |  |
| WNT6     |  |  |  |  |  |
| HAO1     |  |  |  |  |  |
| HSPA4L   |  |  |  |  |  |
| LYAR     |  |  |  |  |  |
| B3GNT8   |  |  |  |  |  |
| DNPEP    |  |  |  |  |  |
| PFDN4    |  |  |  |  |  |
| FAM3B    |  |  |  |  |  |
| APMAP    |  |  |  |  |  |
| MIR608   |  |  |  |  |  |
| ASB9     |  |  |  |  |  |
| NEK11    |  |  |  |  |  |
| NAF1     |  |  |  |  |  |
| MIR32    |  |  |  |  |  |
| CHSY1    |  |  |  |  |  |
| MYNN     |  |  |  |  |  |
| CDK20    |  |  |  |  |  |
| MPP3     |  |  |  |  |  |
| ADAMTS14 |  |  |  |  |  |
| CLDN12   |  |  |  |  |  |
| RHPN2    |  |  |  |  |  |
| TENM3    |  |  |  |  |  |
| MIR20B   |  |  |  |  |  |
| MIR103A1 |  |  |  |  |  |
| MIR28    |  |  |  |  |  |
| PRIMA1   |  |  |  |  |  |
| B4GALT3  |  |  |  |  |  |
| ADAMTSL3 |  |  |  |  |  |



|         |  |  |  |  |  |
|---------|--|--|--|--|--|
| DHX32   |  |  |  |  |  |
| KRT23   |  |  |  |  |  |
| SLFN11  |  |  |  |  |  |
| MIR154  |  |  |  |  |  |
| NME3    |  |  |  |  |  |
| SCRN1   |  |  |  |  |  |
| STK17B  |  |  |  |  |  |
| EPDR1   |  |  |  |  |  |
| MIR29B2 |  |  |  |  |  |
| SAT2    |  |  |  |  |  |
| TM4SF4  |  |  |  |  |  |
| BICC1   |  |  |  |  |  |
| MYRF    |  |  |  |  |  |
| DPPA2   |  |  |  |  |  |
| MAGED4  |  |  |  |  |  |
| GIN51   |  |  |  |  |  |
| PHACTR3 |  |  |  |  |  |
| ZKSCAN3 |  |  |  |  |  |
| HOXB8   |  |  |  |  |  |
| DESI2   |  |  |  |  |  |
| NXN     |  |  |  |  |  |
| HECA    |  |  |  |  |  |
| RPS27L  |  |  |  |  |  |
| SETD1B  |  |  |  |  |  |
| NR2F6   |  |  |  |  |  |
| RHBDD2  |  |  |  |  |  |
| MIR650  |  |  |  |  |  |
| PCDHGC3 |  |  |  |  |  |
| CSMD3   |  |  |  |  |  |

|          |  |  |  |  |  |
|----------|--|--|--|--|--|
| CREB5    |  |  |  |  |  |
| MIR133A2 |  |  |  |  |  |
| CITED4   |  |  |  |  |  |
| GALNT12  |  |  |  |  |  |
| DDX46    |  |  |  |  |  |
| NOC3L    |  |  |  |  |  |
| MIR630   |  |  |  |  |  |
| LCORL    |  |  |  |  |  |
| HSPA12A  |  |  |  |  |  |
| PLEKHG6  |  |  |  |  |  |
| NKD1     |  |  |  |  |  |
| SMAP1    |  |  |  |  |  |
| ARHGAP6  |  |  |  |  |  |
| SLCO4A1  |  |  |  |  |  |
| CA11     |  |  |  |  |  |
| UBXN11   |  |  |  |  |  |
| TTYH2    |  |  |  |  |  |
| CBLN4    |  |  |  |  |  |
| CHPF     |  |  |  |  |  |
| MIR330   |  |  |  |  |  |
| CLDN23   |  |  |  |  |  |
| CDH22    |  |  |  |  |  |
| MIR92A2  |  |  |  |  |  |
| MIR99B   |  |  |  |  |  |
| THSD1    |  |  |  |  |  |
| CMTM2    |  |  |  |  |  |
| CACUL1   |  |  |  |  |  |
| ATP11A   |  |  |  |  |  |
| BTG4     |  |  |  |  |  |

|          |  |  |  |  |  |
|----------|--|--|--|--|--|
| AFAP1L1  |  |  |  |  |  |
| DIP2B    |  |  |  |  |  |
| CRNDE    |  |  |  |  |  |
| SPIDR    |  |  |  |  |  |
| SHROOM2  |  |  |  |  |  |
| B9D2     |  |  |  |  |  |
| PCBD2    |  |  |  |  |  |
| CNPY2    |  |  |  |  |  |
| TUSC7    |  |  |  |  |  |
| MIR874   |  |  |  |  |  |
| DSCC1    |  |  |  |  |  |
| SLC25A28 |  |  |  |  |  |
| ACOXL    |  |  |  |  |  |
| TNN      |  |  |  |  |  |
| CHPF2    |  |  |  |  |  |
| LPCAT4   |  |  |  |  |  |
| TMEM25   |  |  |  |  |  |
| MIR584   |  |  |  |  |  |
| TFAP2E   |  |  |  |  |  |
| ZNF292   |  |  |  |  |  |
| CATSPER3 |  |  |  |  |  |
| FSTL5    |  |  |  |  |  |
| MIR26A2  |  |  |  |  |  |
| MIR605   |  |  |  |  |  |
| PARP11   |  |  |  |  |  |
| WDR76    |  |  |  |  |  |
| MORC1    |  |  |  |  |  |
| WSB2     |  |  |  |  |  |
| MIR498   |  |  |  |  |  |

|          |  |  |  |  |  |
|----------|--|--|--|--|--|
| MIR103A2 |  |  |  |  |  |
| CCSER1   |  |  |  |  |  |
| CASC8    |  |  |  |  |  |
| SUSD6    |  |  |  |  |  |
| C2orf68  |  |  |  |  |  |
| MIR345   |  |  |  |  |  |
| CHSY3    |  |  |  |  |  |
| DNAJB1P1 |  |  |  |  |  |
| MIR454   |  |  |  |  |  |
| MIR484   |  |  |  |  |  |
| KIAA1456 |  |  |  |  |  |
| FAM173B  |  |  |  |  |  |
| MIR612   |  |  |  |  |  |
| ARHGAP30 |  |  |  |  |  |
| MIR374B  |  |  |  |  |  |
| LACTB2   |  |  |  |  |  |
| LONRF1   |  |  |  |  |  |
| MIR320B1 |  |  |  |  |  |
| GPATCH1  |  |  |  |  |  |
| MIR520G  |  |  |  |  |  |
| DACT3    |  |  |  |  |  |
| PNMAL1   |  |  |  |  |  |
| HCFC1R1  |  |  |  |  |  |
| MIR760   |  |  |  |  |  |
| MFAP3L   |  |  |  |  |  |
| CABLES2  |  |  |  |  |  |
| MIR422A  |  |  |  |  |  |
| ZNF768   |  |  |  |  |  |
| MIR1297  |  |  |  |  |  |

|             |  |  |  |  |  |
|-------------|--|--|--|--|--|
| PARP6       |  |  |  |  |  |
| C5orf66     |  |  |  |  |  |
| RERGL       |  |  |  |  |  |
| SEC1P       |  |  |  |  |  |
| CT47A11     |  |  |  |  |  |
| MIR551A     |  |  |  |  |  |
| MIR520A     |  |  |  |  |  |
| MIR1307     |  |  |  |  |  |
| FAM83E      |  |  |  |  |  |
| ZNF492      |  |  |  |  |  |
| TMEM200A    |  |  |  |  |  |
| LINC01475   |  |  |  |  |  |
| AMER3       |  |  |  |  |  |
| MIR552      |  |  |  |  |  |
| MIR592      |  |  |  |  |  |
| MIR601      |  |  |  |  |  |
| CRCS2       |  |  |  |  |  |
| ZNF700      |  |  |  |  |  |
| MIR1288     |  |  |  |  |  |
| CRCS9       |  |  |  |  |  |
| CRCS11      |  |  |  |  |  |
| CRCS5       |  |  |  |  |  |
| CRCS6       |  |  |  |  |  |
| MIR103B2    |  |  |  |  |  |
| MIR103B1    |  |  |  |  |  |
| C8orf37-AS1 |  |  |  |  |  |
| SRSF10P2    |  |  |  |  |  |
| NCRUPAR     |  |  |  |  |  |
| CRCS10      |  |  |  |  |  |

|              |  |  |  |  |  |
|--------------|--|--|--|--|--|
| CRC8         |  |  |  |  |  |
| CRC7         |  |  |  |  |  |
| MIR518A2     |  |  |  |  |  |
| MIR518A1     |  |  |  |  |  |
| DNMT3AP1     |  |  |  |  |  |
| MIR587       |  |  |  |  |  |
| LINC01296    |  |  |  |  |  |
| NPM1P5       |  |  |  |  |  |
| ZMIZ1-AS1    |  |  |  |  |  |
| FLJ22763     |  |  |  |  |  |
| MRPL42P4     |  |  |  |  |  |
| RPL27AP8     |  |  |  |  |  |
| RPL21P46     |  |  |  |  |  |
| VN1R86P      |  |  |  |  |  |
| LOC100131315 |  |  |  |  |  |
| LOC101928844 |  |  |  |  |  |
